# Supplementary material for: Mining of Potential Gene Resources for Breeding Nutritionally Improved Maize
Source: MDPI journal article supplement (doi:10.3390/plants11050627), 2022-02-25
Supplement: s1 [file s1]

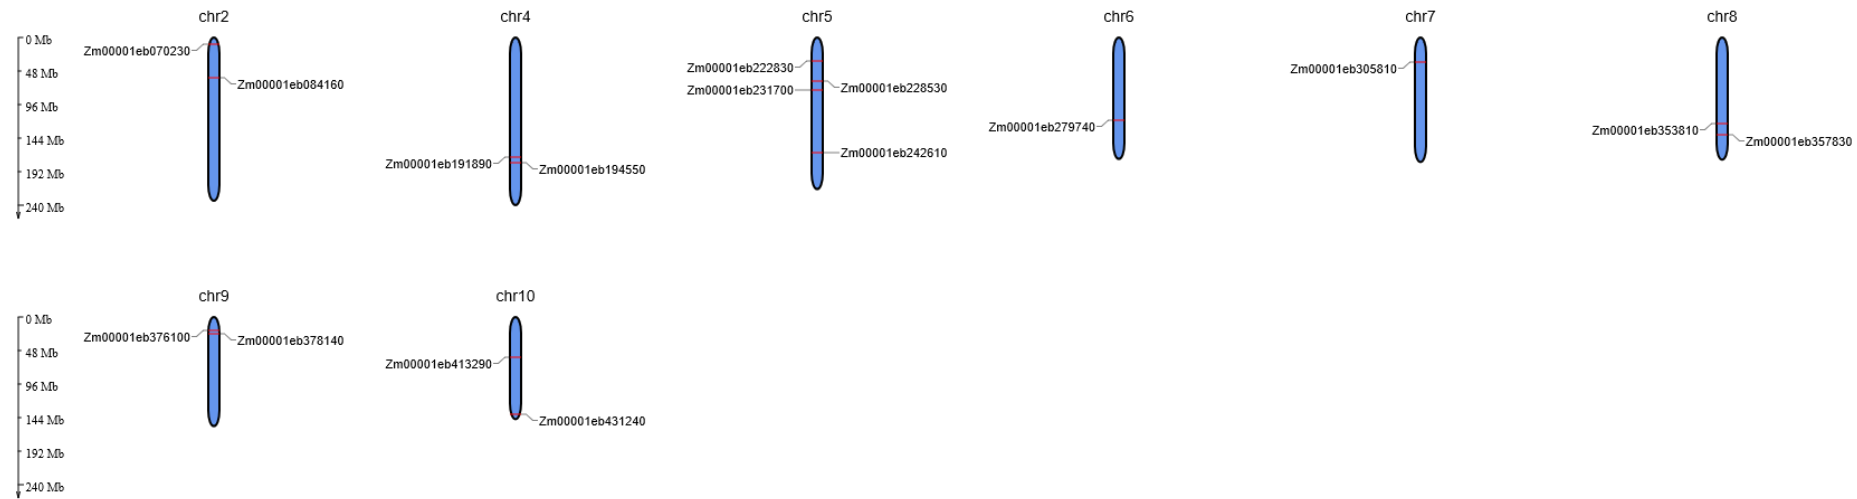

Figure S1-1. Chromosomal locations of potential gene resources for improving resistant starch content in maize. The scale is in megabases (Mb).

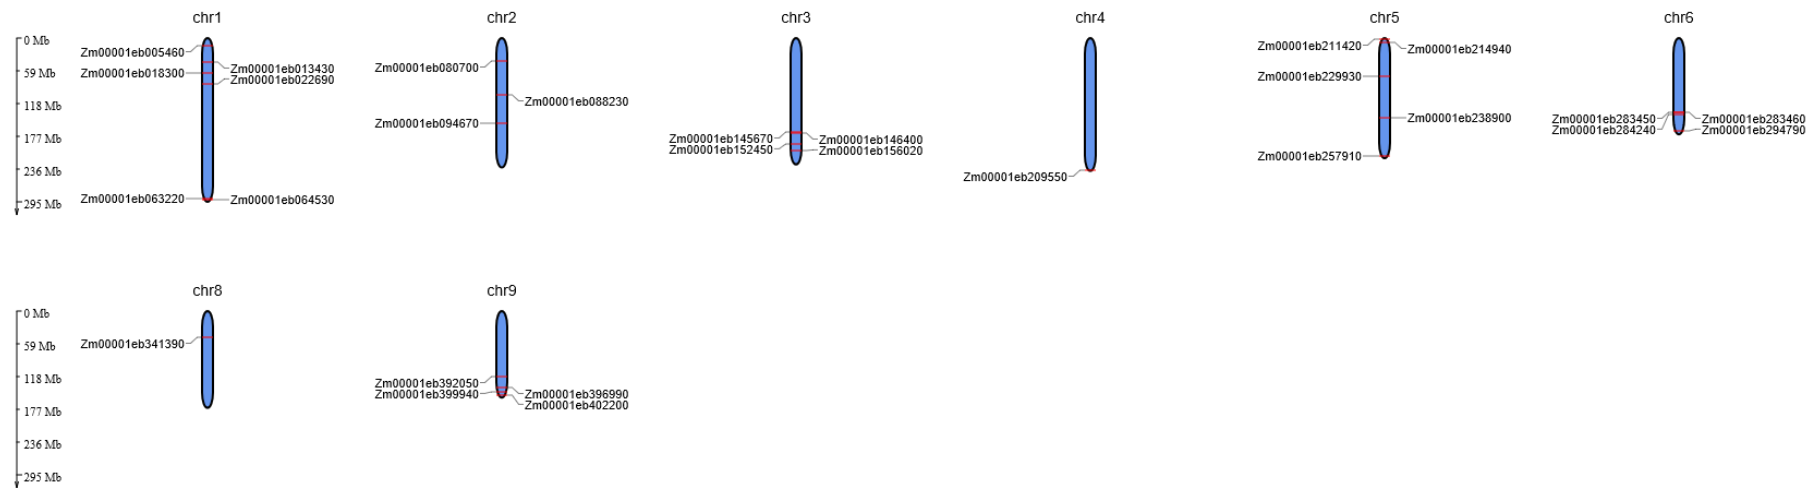

Figure S1-2. Chromosomal locations of potential gene resources for elevating essential amino acid content in maize. The scale is in megabases (Mb).

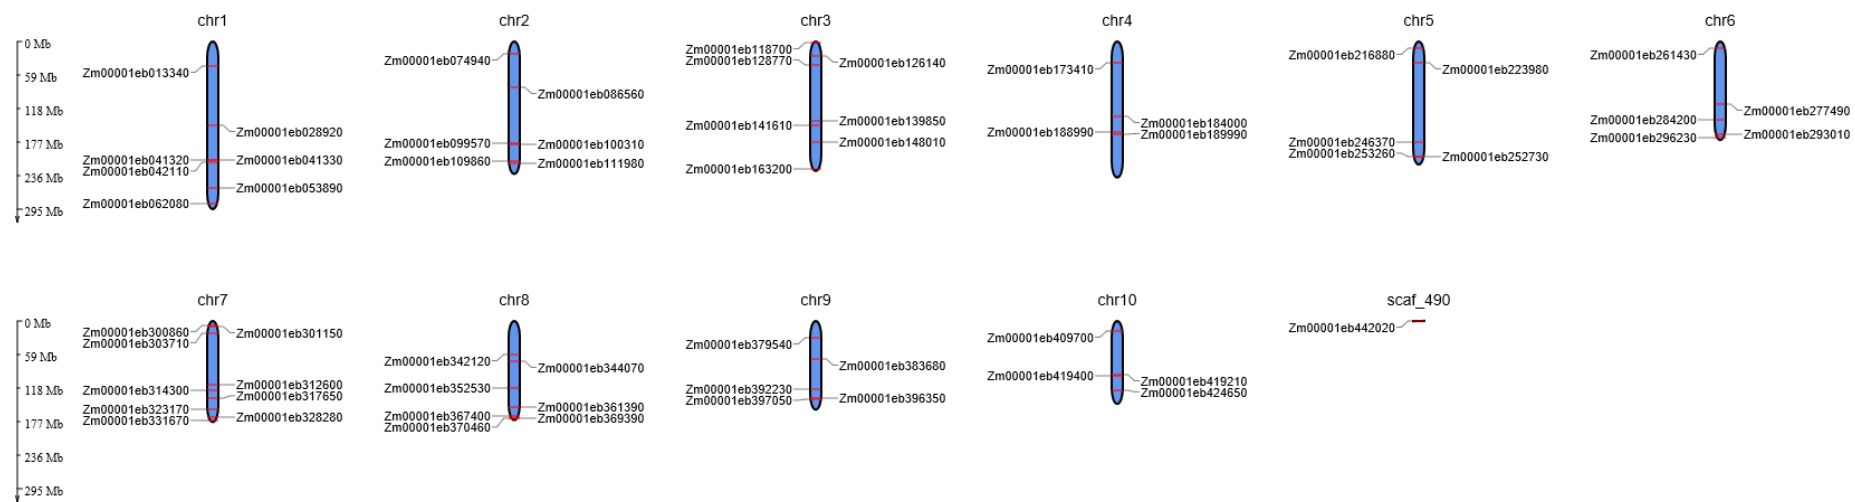

Figure S1-3. Chromosomal locations of potential gene resources for enhancing lipid yield in maize. The scale is in megabases (Mb).

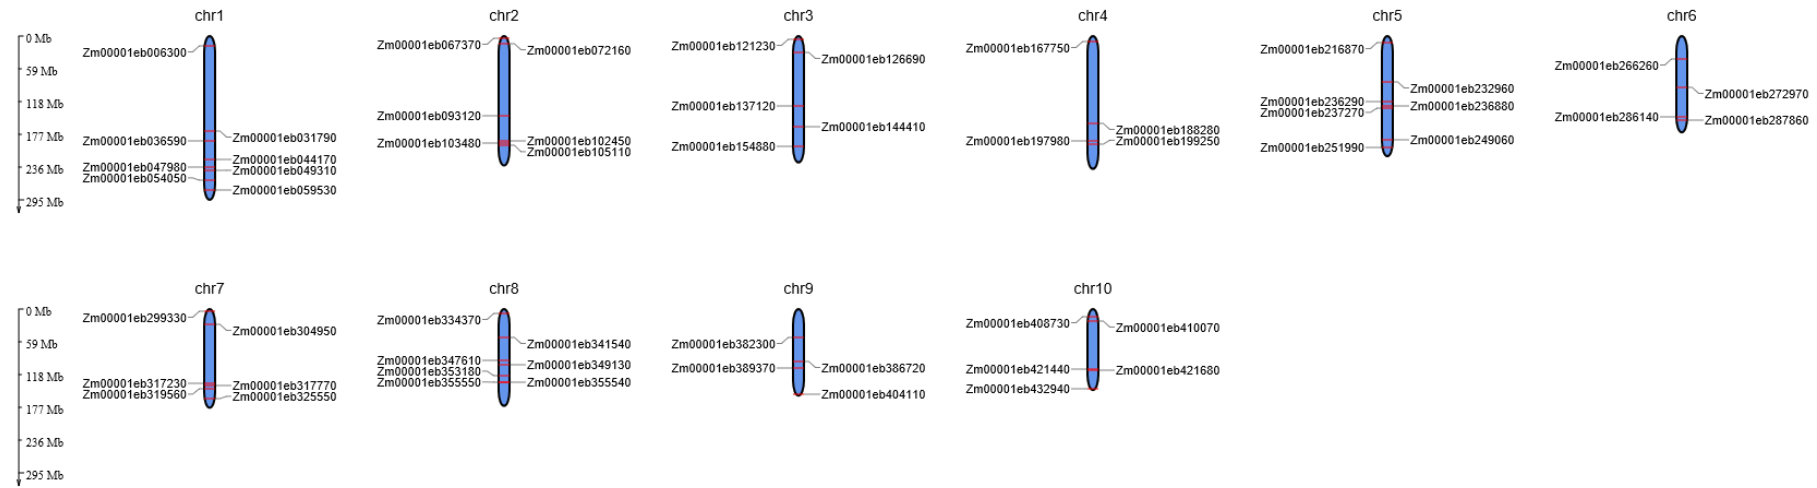

Figure S1-4. Chromosomal locations of potential gene resources for enhancing vitamin contents in maize. The scale is in megabases (Mb).

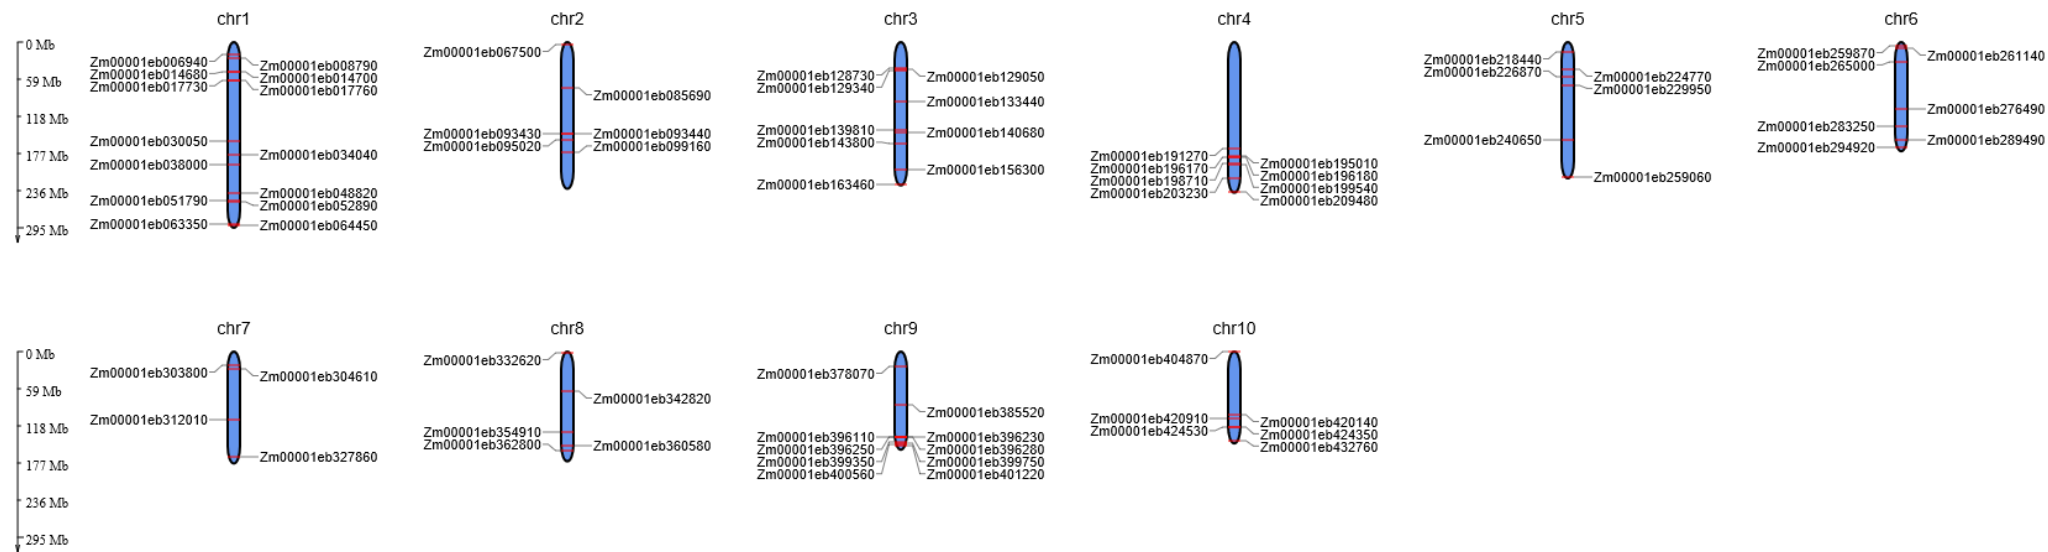

Figure S1-5. Chromosomal locations of potential gene resources for enhancing mineral contents in maize. The scale is in megabases (Mb).

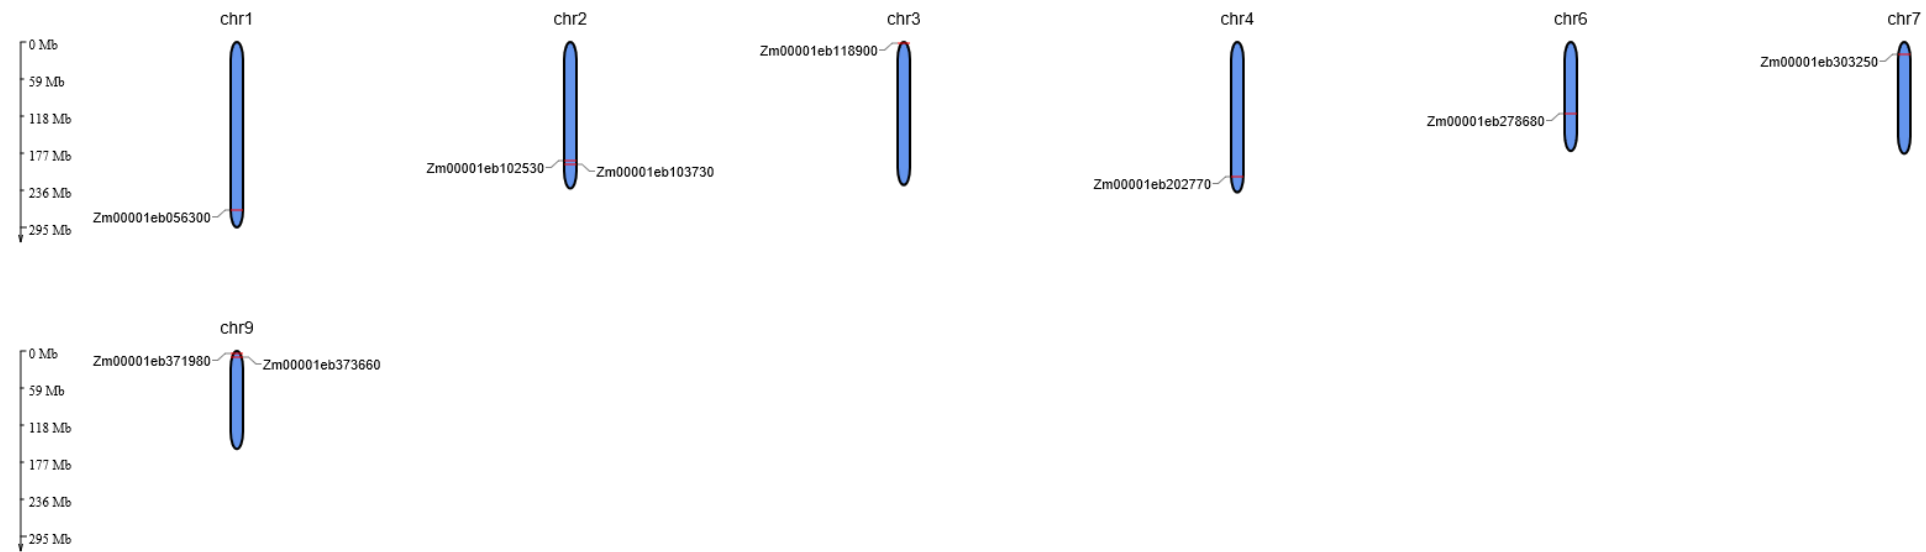

Figure S1-6. Chromosomal locations of potential gene resources for enhancing anthocyanin content in maize. The scale is in megabases (Mb).
